# Supplementary material
Source: PubMed Central journal article supplement (PMC7726772)
Supplement: EMBR-21-e51444-s001.pdf [file EMBR-21-e51444-s001.pdf]

## Appendix Table of contents

|                    | Page |
|--------------------|------|
| Appendix Figure S1 | 2    |
| Appendix Figure S2 | 3    |
| Appendix Figure S3 | 4    |
| Appendix Figure S4 | 5    |
| Appendix Figure S5 | 6    |
| Appendix Table S1  | 7    |
| Appendix Table S2  | 7    |
| Appendix Table S3  | 9    |

## Appendix Figure S1

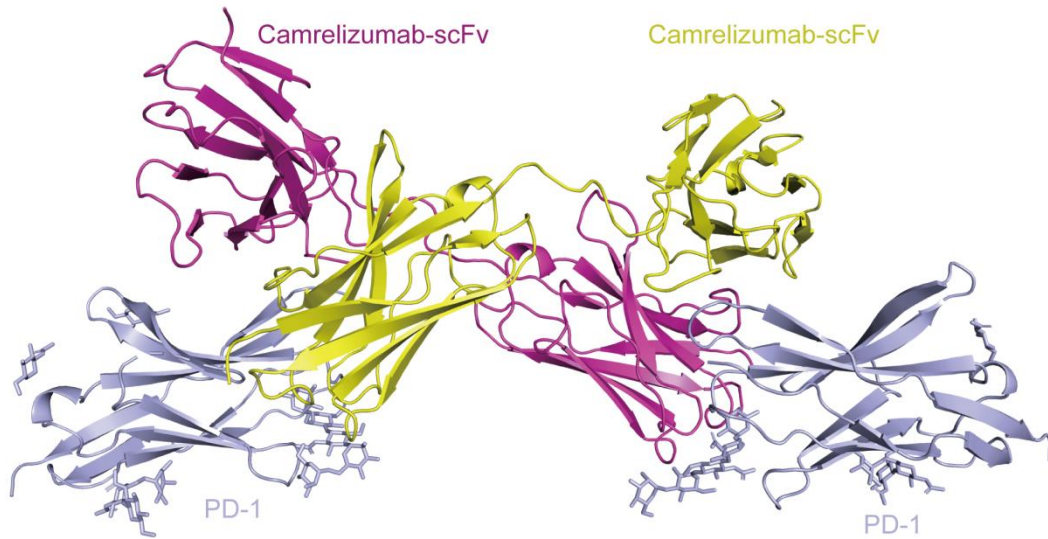

### Appendix Figure S1. Overall complex structure of camrelizumab-scFv/PD-1.

Camrelizumab-scFv is constructed as VH-GGGGS-VL and refolded as dimer. The complex structure of camrelizumab-scFv/PD-1 includes two camrelizumab-scFvs and two PD-1 molecules.

## Appendix Figure S2

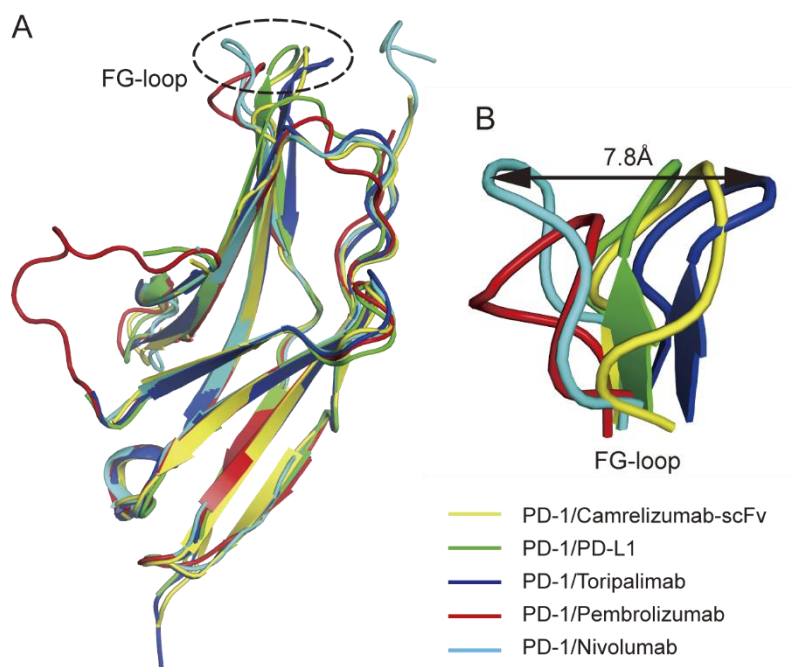

### Appendix Figure S2. Comparison of PD-1 structures complexed with different

**MAbs.** (A) Superimposition of PD-1s extracted from complex structure of PD-1/camrelizumab (yellow), PD-1/PD-L1 (green), PD-1/toripalimab (marine blue), PD-1/pembrolizumab (red) and PD-1/nivolumab (cyan). The FG loops of PD-1 targeted by nivolumab or pembrolizumab are colored differently as follows, N-loop, red; BC loop, green; FG loop, blue; C'D loop, magenta. (B) The variation of FG loop of PD-1 is highlighted and substantially shift of the FG loop upon binding to nivolumab and toripalimab is indicated.

### Appendix Figure S3

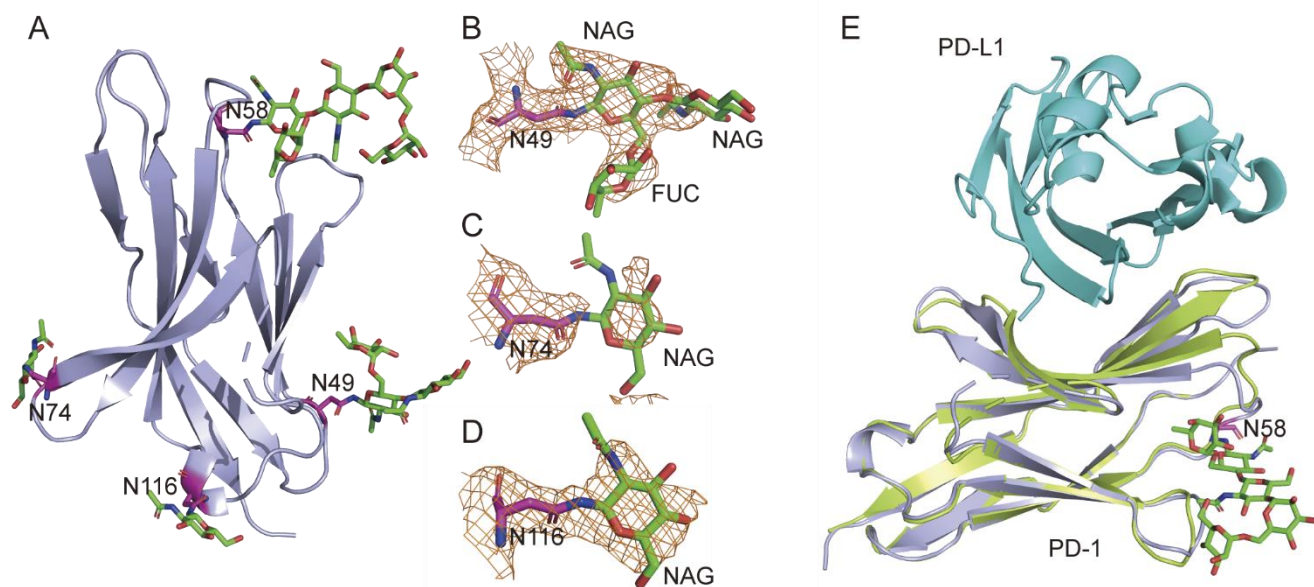

**Appendix Figure S3. Glycosylations observed in the PD-1 structure.** (A) The four N-linked glycosylation sites (N49, N58, N74, and N116) are shown in sticks and colored in purple. The observed glycans are highlighted in sticks and colored in lemon. (B-D) The 2 Fo-Fc electron density map of the N49, N74, N116 N-linked glycans contoured at 1.0 sigma is represented in orange. (E) Modeling of the location the N58 glycosylation in the complex of PD-1 and PD-L1.

## Appendix Figure S4

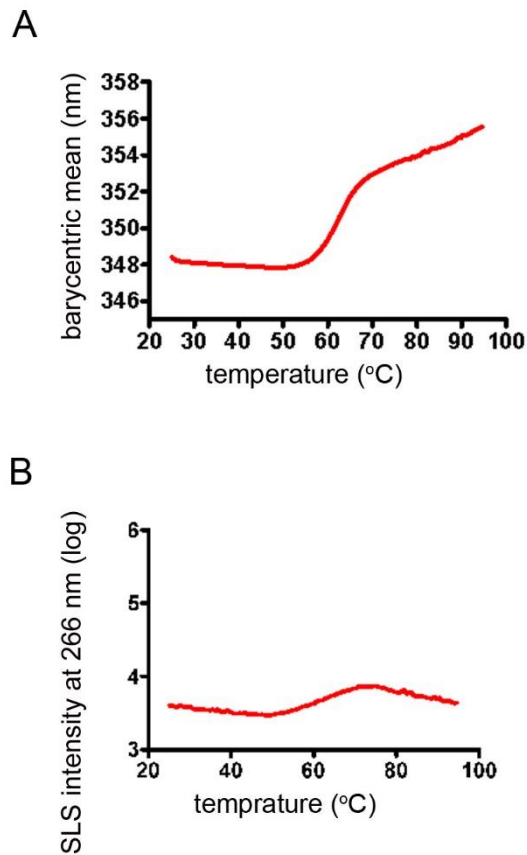

### Appendix Figure S4. Thermal stability of N58A mutated PD-1 protein.

Accelerated thermal stability of N58A mutated PD-1 proteins obtained from 293T cells (red line) was characterized in all-in-one UNcle platform. Protein unfolding was observed as an increase in barycentric mean (**A**) while small particle formation of the samples was observed as an increase in SLS intensity at 266 nm (**B**).

## Appendix Figure S5

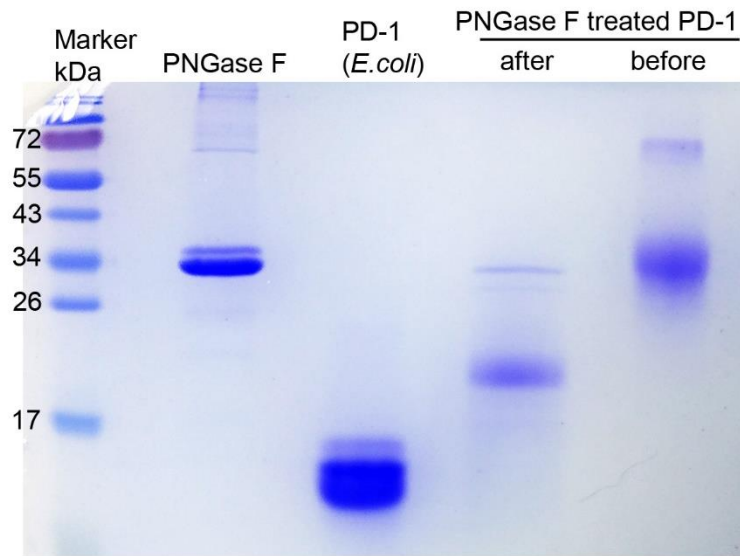

### Appendix Figure S5. SDS-PAGE analysis of PNGase F treated PD-1 proteins.

The protein samples before and after PNGase F treatment were analyzed by SDS-PAGE, with PNGase F and PD-1 proteins obtained from *E.coli* cells analyzed in parallel as control.

**Appendix Table S1. SPR analysis of the binding between MABs and PD-1**

|                                     | Ka (Ms)            | Kd (1/s)              | KD (nM) |
|-------------------------------------|--------------------|-----------------------|---------|
| Camrelizumab vs PD-1-293T           | $1.91 \times 10^5$ | $1.13 \times 10^{-3}$ | 5.92    |
| Camrelizumab vs PD-1-insect cell    | $2.29 \times 10^5$ | $1.54 \times 10^{-3}$ | 6.73    |
| Camrelizumab vs PD-1-E.coli         | $7.51 \times 10^4$ | $1.17 \times 10^{-1}$ | 1 555   |
| Camrelizumab vs PD-1-N58A           | $9.00 \times 10^4$ | $1.02 \times 10^{-2}$ | 113     |
| Camrelizumab vs PD-1-WT             | $1.47 \times 10^4$ | $1.54 \times 10^{-3}$ | 4.74    |
| Camrelizumab vs PD-1-PNGase-treated | $3.07 \times 10^5$ | $1.45 \times 10^{-3}$ | 105     |
| Nivolumab vs PD-1-WT                | $6.09 \times 10^5$ | $6.93 \times 10^{-3}$ | 11.4    |
| Nivolumab vs PD-1-N58A              | $7.23 \times 10^5$ | $7.60 \times 10^{-3}$ | 10.5    |
| Pembrolizumab vs PD-1-WT            | $8.33 \times 10^5$ | $6.23 \times 10^{-3}$ | 7.48    |
| Pembrolizumab vs PD-1- N58A         | $9.37 \times 10^5$ | $5.29 \times 10^{-3}$ | 5.65    |

**Appendix Table S2. Crystallographic data collection and refinement statistics.**

| camrelizumab/PD-1                 |                        |
|-----------------------------------|------------------------|
| <b>Data collection</b>            |                        |
| Space group                       | P1                     |
| Wavelength (Å)                    | 0.97918                |
| Unit cell dimensions              |                        |
| a, b, c (Å)                       | 43.11, 77.62, 96.05    |
| $\alpha$ , $\beta$ , $\gamma$ (°) | 69.38, 78.44, 88.57    |
| Resolution (Å)                    | 50.00-2.80 (2.90-2.80) |

|                          |              |
|--------------------------|--------------|
| Unique. reflections      | 27286 (2726) |
| $R_{merge}$              | 0.079/0.692  |
| $I/\sigma$               | 11.58(1.29)  |
| Completeness (%)         | 98.4 (98.4)  |
| Redundancy               | 3.4 (3.6)    |
| <b>Refinement</b>        |              |
| Resolution (Å)           | 29.68-2.81   |
| $R_{work} / R_{free}$    | 0.212/0.252  |
| No. atoms                | 5486         |
| Protein                  | 5248         |
| Ligands                  | 0            |
| Water                    | 0            |
| <b>R.m.s. deviations</b> |              |
| Bond lengths (Å)         | 0.005        |
| Bond angles (°)          | 0.678        |
| <b>Ramachandran plot</b> |              |
| Favored (%)              | 93.13        |
| Allowed (%)              | 6.87         |
| Outliers (%)             | 0.00         |

---

\*Values in parentheses are for highest-resolution shell.



**Appendix Table S3. Residues contributed interaction between camrelizumab and PD-1**

|                          | Antibody                 | Contacts               | hPD-L1                 | Total<br>Contacts |
|--------------------------|--------------------------|------------------------|------------------------|-------------------|
| H Chain(V <sub>H</sub> ) | S30                      | 3 <sup>1</sup>         | FUC303                 | 142               |
|                          | S31                      | 5, 10 (1) <sup>2</sup> | P83, FUC303            |                   |
|                          | Y32                      | 12, 4                  | P83, E84               |                   |
|                          | M33                      | 3, 6                   | S62, L128              |                   |
|                          | S52                      | 8 (1), 1               | E61, S62               |                   |
|                          | G53                      | 2, 4 (1)               | E61, FUC303            |                   |
|                          | G54                      | 11, 2, 5               | E61, NAG302,<br>FUC303 |                   |
|                          | G55                      | 3                      | E61                    |                   |
|                          | A56                      | 9 (1), 1               | E61, NAG302            |                   |
|                          | N57                      | 4, 7 (1), 4            | S60, E61, S62          |                   |
|                          | Y59                      | 4 (2), 1, 7            | S62, A129, P130        |                   |
|                          | L100                     | 1, 8                   | V64, L128              |                   |
|                          | Y101                     | 2, 1, 6, 7             | V64, K78, I126, L128   |                   |
|                          | L Chain(V <sub>L</sub> ) | W32                    | 2, 18, 3, 5            |                   |
| V91                      |                          | 3                      | A132                   |                   |
| Y92                      |                          | 3, 8, 13 (1)           | P130, K131, A132       |                   |

---

|     |       |            |
|-----|-------|------------|
| S93 | 5, 4  | P130, Q131 |
| I94 | 8 (1) | P130       |
| W96 | 2     | L128       |

---

<sup>1</sup> Numbers represent the number of atom-to-atom contacts between camrelizumab and PD-1 residues, which were analyzed by the Contact program in CCP4 suite (the distance cutoff is 4.5Å).

<sup>2</sup> Numbers in the parentheses represent the number of hydrogen bonds between camrelizumab and PD-1 residues which were analyzed by the Contact program in CCP4 suite (the distance cutoff is 3.5 Å).
